# Supplementary material for: Study on the roles of glycolipid metabolism indicators and microRNAs in benign prostatic hyperplasia
Source: publisher site journal article supplement (doi:10.1515/tjb-2025-0043), 2025-10-16
Supplement: Supplementary file 1 [file j_tjb-2025-0043_suppl_002.docx]

**Supplementary Table 1.** The clinical information of participants

|  | **Healthy volunteers** | **BPH patients** |
| --- | --- | --- |
| Numbers (n) | 100 | 110 |
| IPSS (score) | - | 15.5±10.7 |
| Age (years) | 58.1±5.6 | 62.1±5.2 |
| Smoking (Yes/No) | 50/50 | 51/59 |
| Drinking (Yes/No) | 53/47 | 54/56 |
| BMI (kg/m2) | 23.6±3.2 | 26.5±2.5 |
| FBG (mmol/L) | 5.2±0.8 | 6.0±0.9 |
| HbA1c (%) | 5.6±1.0 | 7.2±2.0 |
| TC (mmol/L) | 5.6±1.2 | 6.4±0.7 |
| TG (mmol/L) | 2.2±1.4 | 3.6±1.0 |

BPH, benign prostatic hyperplasia; IPSS, international prostate symptom score; BMI, body mass index; FBG, fasting blood glucose; HbA1c, Hemoglobin A1c; TC, total cholesterol; TG, triglyceride.
